# Supplementary material for: Kinetic processes of phase separation and aggregation behaviors in slot-die processed high efficiency Y6-based organic solar cells
Source: Royal Society of Chemistry journal article supplement (doi:10.1039/d2ta02541h), 2022-01-01
Supplement: d2ta02541h1.pdf [file d2ta02541h1.pdf]

1 Electronic Supplementary Information  
2 Kinetic Processes of Phase Separation and Aggregation Behaviors  
3 in Slot-die Processed High Efficiency Y6-based Organic Solar Cells

4  
5 Jingwei Xue, ‡<sup>a</sup> Hafiz Bilal Naveed, ‡<sup>a</sup> Heng Zhao,<sup>a</sup> Baojun Lin,<sup>a</sup> Yilin Wang,<sup>a</sup> Qinglian  
6 Zhu,<sup>a</sup> Baohua Wu,<sup>a</sup> Zhaozhao Bi,<sup>a</sup> Xiaobo Zhou,<sup>a</sup> Chao Zhao,<sup>a</sup> Ke Zhou\*<sup>a</sup> and Wei Ma\*<sup>a</sup>

7  
8 J. Xue, H. Zhao, B. Lin, Y. Wang, Q. Zhu, B. Wu, Z. Bi, X. Zhou, Dr. C. Zhao, Dr. K.  
9 Zhou, Prof. W. Ma

10 State Key Laboratory for Mechanical Behavior of Materials, Xi'an Jiaotong University,  
11 Xi'an 710049, China

12 \*Corresponding author. E-mail: [msekzhou@xjtu.edu.cn](mailto:msekzhou@xjtu.edu.cn); [msewma@xjtu.edu.cn](mailto:msewma@xjtu.edu.cn)

13  
14 **Experiment section**

15 **Materials.** D18 poly[(2,6-(4,8-bis(5-(2-ethylhexyl-3-fluoro)thiophen-2-yl)-benzo[1,2-  
16 b:4,5-b']dithiophene))-alt-(2-butyloctyl) thiophen-2-yl)-8-(4-(2-butyloctyl)-5-  
17 methylthiophen-2-yl)dithieno[3',2':3,4;2'',3'':5,6]benzo[1,2-c][1,2,5]thiadiazole)]) and Y6  
18 (2,2'-((2Z,2'Z)-((12,13-bis(2-ethylhexyl)-3,9-diundecyl-12,13-dihydro-  
19 [1,2,5]thiadiazolo[3,4-e]thieno[2'',3'':4',5']thieno[2',3':4,5]pyrrolo[3,2-  
20 g]thieno[2',3':4,5]thieno[3,2-b]indole-2,10-diyl)bis(methanylylidene)) bis(5,6-difluoro-3-

1 oxo-2,3-dihydro-1H-indene-2,1-diylidene)) dimalononitrile) were purchased from Hyper,  
2 Inc. PM6 Poly[(2,6-(4,8-bis(5-(2-ethylhexyl-3-fluoro)thiophen-2-yl)-benzo[1,2-b:4,5-  
3 b']dithiophene))-alt-(5,5-(1',3'-di-2-thienyl-5',7'-bis(2-ethylhexyl)benzo[1',2'-c:4',5'-  
4 c']dithiophene-4,8-dione))] was purchased from Solarmer Materials Inc. All chemicals  
5 were used as received without further purification. The patterned glass/ITO substrates were  
6 purchased from South China Science & Technology Co., Ltd. The patterned PET/ITO  
7 substrates were purchased from Youxuan New Energy Technology Co., Ltd. The ZnO  
8 precursor was prepared by dissolving zinc acetate dehydrate in 2-methoxyethanol with  
9 ethanolamine<sup>1</sup>.

10

#### 11 **Device Fabrication.**

12 The BHJ devices were fabricated with an inverted device structure of glass/ITO/ZnO/active  
13 layer/MoO<sub>3</sub>/Al. The patterned ITO substrate was continuously cleaned three times by  
14 sonication in water with detergent, deionized water, acetone, and isopropanol for 30 min  
15 of each step. Then the substrate was dried with a nitrogen gun. After ultraviolet ozone  
16 treatment for 20 min, the ZnO precursor was spin-coated on the ITO substrate at 4500 rpm  
17 to form an electron transporting layer ZnO. Then, the substrate was baked at 200 °C for 30  
18 min. Three solvents were used in the experiments containing chloroform, chlorobenzene  
19 and mixed solvents (MS) (CF as the primary solvent with 0.5% v/v CB). For D18:Y6 the  
20 active layer solution was prepared in three solvents at a total concentration of 8 mg/mL  
21 (D/A = 1:1.6 by weight) without any additives. For PM6:Y6 the active layer solution was  
22 prepared in three solvents at a total concentration of 16 mg/mL (D/A = 1:1.2 by weight)  
23 without any additives. After that, a 110 nm film of the active layer was coated by slot-die

1 coating in ambient conditions. For the slot-die coating, the solution was pumped onto a  
2 moving substrate through the slot in the coating head. The gap between the substrate and  
3 the head was 100  $\mu\text{m}$ . The substrate temperature were controlled by heating element. The  
4 speed of the substrate and the injection speed of the solution were adjusted to obtain  
5 different active layer thickness. The final BHJ films were transferred to the N<sub>2</sub>-filled  
6 glovebox without any further treatment. Finally, a 10 nm MoO<sub>3</sub> and 100 nm Al were  
7 sequentially deposited as anode below the vacuum level of  $1 \times 10^{-4}$  Pa. The device active  
8 area of small-area device is 0.04 cm<sup>2</sup>.

9  
10 **Characterization.** The UV–vis absorption spectrum was measured by a Shimadzu UV-  
11 3600 Plus Spectrophotometer. The film thickness was measured by a surface profilometer  
12 (Dektak XT, Bruker). The  $J$ – $V$  characteristics were performed in a N<sub>2</sub>-filled glovebox  
13 under AM 1.5G (100 mW/cm<sup>2</sup>) using a Keithley 2400 source meter unit and an AAA solar  
14 simulator (SS-F5-3A, Enli Technology CO., Ltd.) calibrated by a standard Si photovoltaic  
15 cell with a KG5 filter. The EQE was measured by a solar cell spectral response  
16 measurement system (QE-R3018, Enli Technology CO., Ltd.) with the calibrated light  
17 intensity by a standard single-crystal Si photovoltaic cell. TEM characterization was  
18 performed by a FEI Talos F200c transmission electron microscope at 200 kV. AFM  
19 characterization was scanned by Veeco INNOVA Atomic Force Microscope using a  
20 tapping mode. The contact angle was obtained by KRUSS DSA 100 with water and  
21 diiodomethane.

22  
23 **Hole and Electron Mobility Measurements.** The mobilities were measured by using a  
24 space charge limited current (SCLC) model with the hole-only device of

1 glass/ITO/PEDOT:PSS/active layer/MoO<sub>x</sub>/Al and electron-only device of glass/ITO/ZnO/  
2 active layer /PDINO/Al. Hole mobility and electron mobility were obtained by fitting the  
3 current density-voltage curves and calculated by the equation <sup>2,3</sup>:

$$4 \quad J = 9 \varepsilon_0 \varepsilon_r \mu (V_{appl} - V_{bi} - V_s)^2 / 8L^3$$

5 Where  $J$  is current density,  $\varepsilon_0$  is the permittivity of free space,  $\varepsilon_r$  is the relative permittivity  
6 of the material (assumed to 3),  $\mu$  is hole mobility or electron mobility,  $V_{appl}$  is applied  
7 voltage,  $V_{bi}$  is the built-in voltage due to the relative work function difference of the two  
8 electrodes,  $V_s$  is the voltage drop from the substrate's series resistance ( $V_s=IR$ ) and  $L$  is the  
9 thickness of active layer.

10

#### 11 **Grazing Incidence Wide-Angle X-ray Scattering (GIWAXS) Characterization.**

12 GIWAXS measurements<sup>4</sup> were performed at beamline 7.3.3 at the Advanced Light Source.  
13 Samples were prepared on Si substrates using identical blend solutions as those used in  
14 devices. The 10 keV X-ray beam was incident at a grazing angle of 0.10-0.16°, selected to  
15 maximize the scattering intensity from the samples. The scattered x-rays were detected  
16 using a Dectris Pilatus 2 M photon counting detector.

17

18 **Resonant Soft X-ray Scattering (RSoXS):** RSoXS<sup>5,6</sup> transmission measurements were  
19 performed at beamline 11.0.1.2 at the Advanced Light Source. Samples for RSoXS  
20 measurements were prepared on a PSS modified Si substrate under the same conditions as  
21 those used for device fabrication, and then transferred by floating in water to a 1.5 mm×1.5  
22 mm, 100 nm thick Si<sub>3</sub>N<sub>4</sub> membrane supported by a 5 mm×5 mm, 200 μm thick Si frame  
23 (Norcada Inc.). 2D scattering patterns were collected on an in-vacuum CCD camera  
24 (Princeton Instrument PI-MTE). The sample detector distance was calibrated from  
25 diffraction peaks of a triblock copolymer poly(isoprene-b-styrene-b-2-vinyl pyridine),

1 which has a known spacing of 391 Å. The beam size at the sample is approximately 100  
2 μm by 200 μm. Near the carbon absorption edge (around 285 eV, which is in the soft X-ray  
3 range), the index of refraction of polymers varies drastically and uniquely, yielding  
4 extremely varying and high contrast<sup>7</sup>. In our systems, the index of refraction of materials  
5 also varies drastically and uniquely near the carbon absorption edge. We have employ the  
6 R-SoXS measurements at different energy (270, 282, 283, 284.2, 284.8, 285.2, 285.8,  
7 286.8 eV) near the carbon absorption edge to get the high contrast. Finally, we found the  
8 scattering at 284.2 eV get the highest contrast.

9 The relative domain purity can be extracted by integrating the R-SoXS scattering profiles  
10 via total scattering intensity (TSI).(Modern Aspects of Small-Angle Scattering. Kluwer  
11 Academic Publishers: Dordrecht, 1995, 45, 463. Colloid Polym. Sci. 1952 , 125 , 108 .  
12 Small Angle X-ray Scattering (Eds: O. Glatter , O. Kratky ),Academic Press , London 1982  
13 .)

$$14 \quad TSI = \int_0^{\infty} I(q) q^2 dq = 2\pi^2 V \sum_{i \neq j} \Delta\rho_{ij}^2 \phi_i \phi_j$$

15 where  $\Delta\rho_{ij}$  is for the conventional SAXS the difference in electron density between the  
16  $i^{th}$  and  $j^{th}$  phases,  $\phi_i$  is the volume fraction of  $i^{th}$  phase and it follows that  $\sum \phi_i = 1$ . Note  
17 that  $\Delta\rho_{ij}$  becomes the difference in composition between the  $i^{th}$  and  $j^{th}$  phases in R-SoXS  
18 and  $\Delta\rho_{ij}^2$  is proportional to the optical contrast of  $\Delta n^2 = \Delta\delta_{ij}^2 + \Delta\beta_{ij}^2$ , where  $\Delta\delta_{ij}$  and  $\Delta\beta_{ij}$   
19 are the difference of dispersive and absorptive optical constants, respectively.  
20 Subsequently it is helpful to define  $\Delta c_{ij}$  as a parameter describing the average composition  
21 variation between the  $i^{th}$  and  $j^{th}$  phases. The TSI expression can then be rewritten as

$$TSI = \int_0^{\infty} I(q) q^2 dq = 2\pi^2 V \sum_{i \neq j} \Delta c_{ij}^2$$

To be more specific, in a two-phase system the TSI can be simplified to

$$TSI = \int_0^{\infty} I(q) q^2 dq = 2\pi^2 V \Delta \rho_{12}^2 \phi_1 \phi_2 = 2\pi^2 V \Delta c_{12}^2$$

where  $\phi_2 = 1 - \phi_1$ . Given the straightforward relation between  $\phi_1$  and  $\phi_2$ , the average composition variation is proportional to domain purity<sup>8</sup>.

**In-situ Ultraviolet-visible (UV-vis) Absorption Measurements.** In-situ UV-vis absorption measurements were performed by the Filmetrics F20-EXR spectrometer using the transmission mode with the time resolution of 0.04 s. The spectrometer consists of light source and detector. The light source and detector are fixed above and below the substrate, respectively, and on the same vertical line. The solution was injected into the slot and the film was coated onto the glass substrate. The detector collects the transmission spectra ranged from 400 to 1050 nm during coating. The UV-vis absorption spectra are calculated from the transmission spectra according to the equation  $A_\lambda = -\log_{10}(T)$ , where  $A_\lambda$  is the absorbance at a certain wavelength ( $\lambda$ ) and  $T$  is the calculated transmittance. The light source and detector were turned on before coating the film, so time zero is the point when the first solution transmission spectrum was collected by the detector. Before time zero, there is only noise in the transmission spectra.

**In-situ Photoluminescence Spectra Measurements.** In-situ Photoluminescence Spectra Measurements were performed by a laser device (MGL-III-532nm-300m W-BH80018) with time resolution of 0.1s. The excitation wavelength was 532 nm.

4

5

6

**Table S1.** The summarized surface free energy, solubility parameters, and interaction parameters.

| <i>i</i> | $\gamma_s$ [mN m <sup>-1</sup> ] | $\delta$ [Mpa <sup>1/2</sup> ] | $\chi$ [Y6, <i>i</i> ] |
|----------|----------------------------------|--------------------------------|------------------------|
| Y6       | 44.44                            | 24.45                          | /                      |
| D18      | 34.11                            | 21.42                          | 0.64                   |
| PM6      | 35.15                            | 21.75                          | 0.58                   |

9

**Table S2.** The Phase Separation Parameters of D18:Y6 and PM6:Y6 blend active layers with different solvents.

| active layer | solvent | q [nm <sup>-1</sup> ] | domain size [nm] |
|--------------|---------|-----------------------|------------------|
| D18:Y6       | CF      | 0.181                 | 17.32            |
|              | 0.5%CB  | 0.157                 | 23.84            |
|              | CB      | 0.072                 | 43.48            |
| PM6:Y6       | CF      | 0.095                 | 32.98            |
|              | 0.5%CB  | 0.093                 | 33.90            |
|              | CB      | 0.078                 | 40.19            |

12

13

1  
2  
3  
4  
5  
6

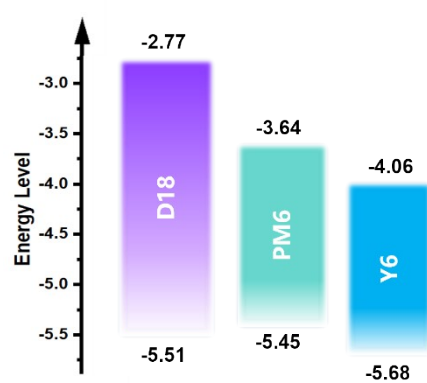

7

8 **Figure S1.** The energy levels of D18, PM6, and Y6.

9

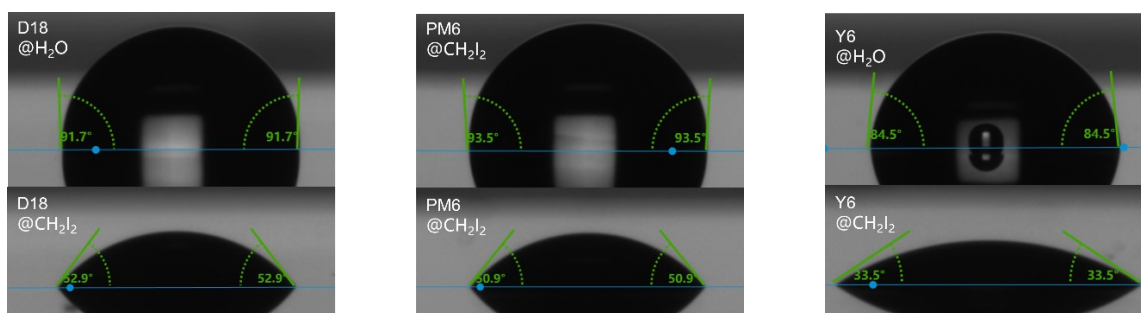

10

11 **Figure S2.** Contact angles of D18, PM6 and Y6.

12

13

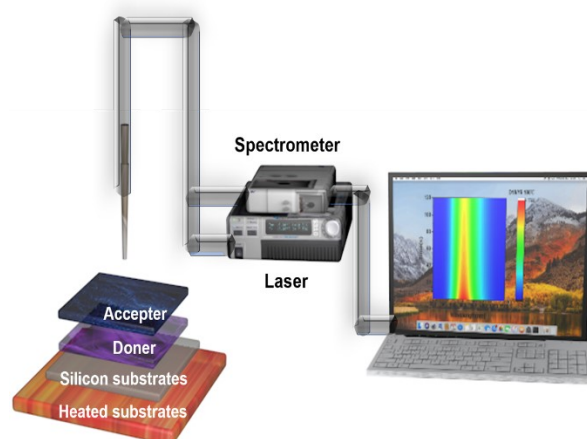

1

2 **Figure S3.** Schematic illustration of in situ PL spectra measurement of double-layer  
3 structure under heating at 100°C.

4

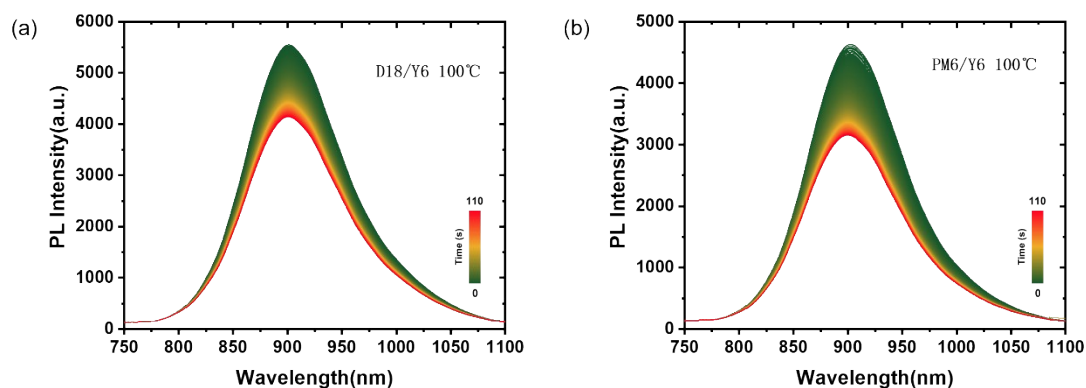

5

6 **Figure S4.** In-situ PL spectra excited at 785 nm for (a) D18/Y6 and (b) PM6/Y6 for double-  
7 layer structure heated at 100 °C for 110 s.

8

9

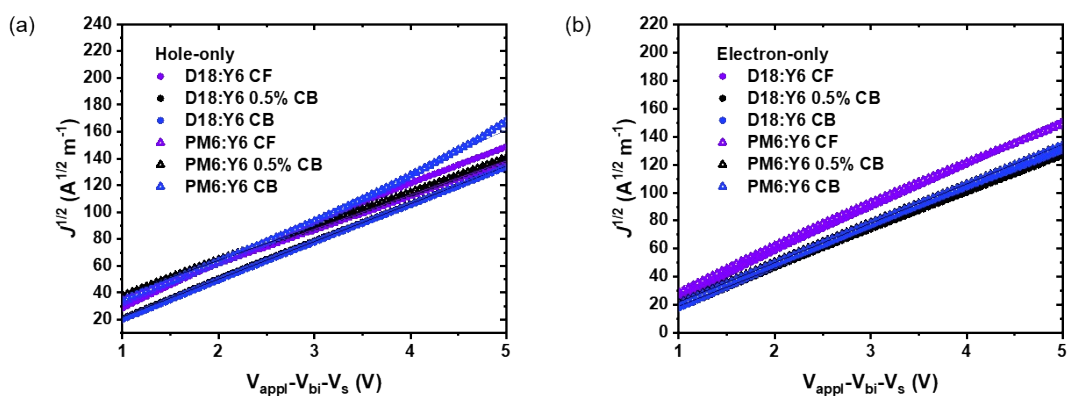

1  
2 **Figure S5.**  $J^{1/2}$ - $V$  characteristics of (a) hole-only and (b) electron-only devices for D18:Y6  
3 and PM6:Y6 devices.

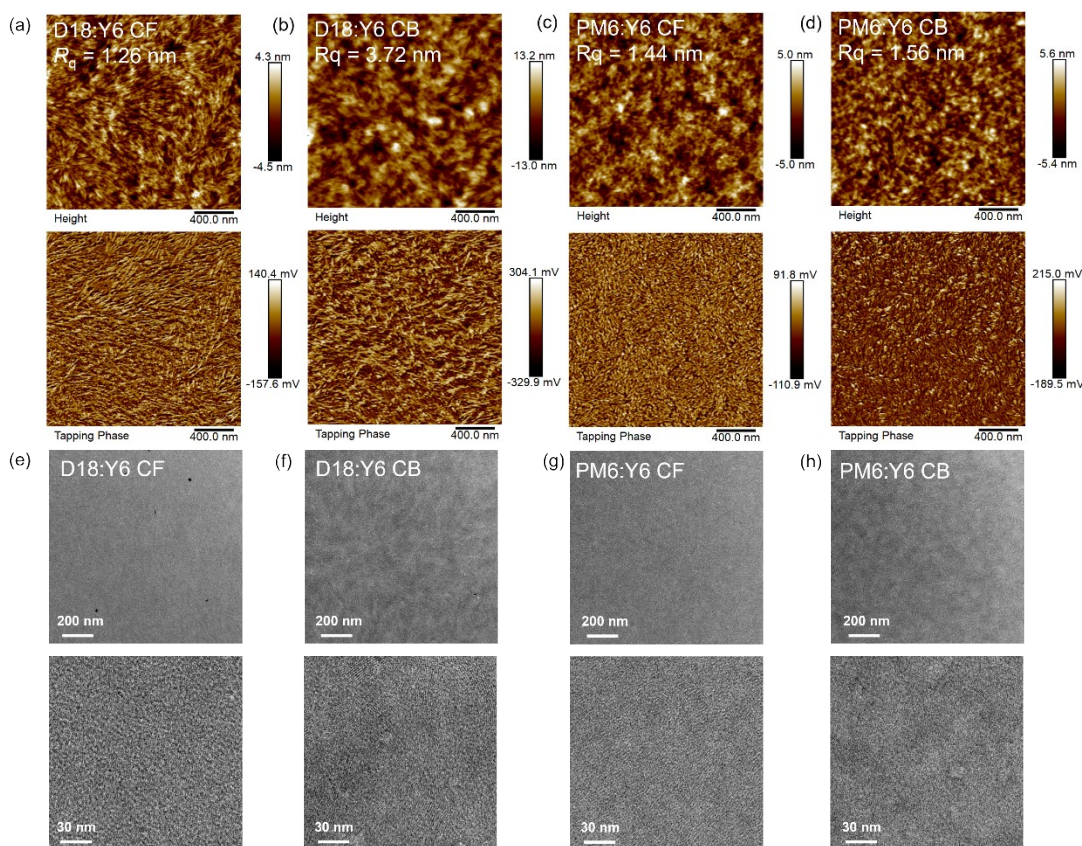

4  
5 **Figure S6.** AFM height and phase images for the (a-b) D18:Y6 and (c-d) PM6:Y6 blend  
6 films in different solvents. TEM images with different scales for blend films based  
7 on (e-f) D18:Y6 and (g-h) PM6:Y6 in different solvents.

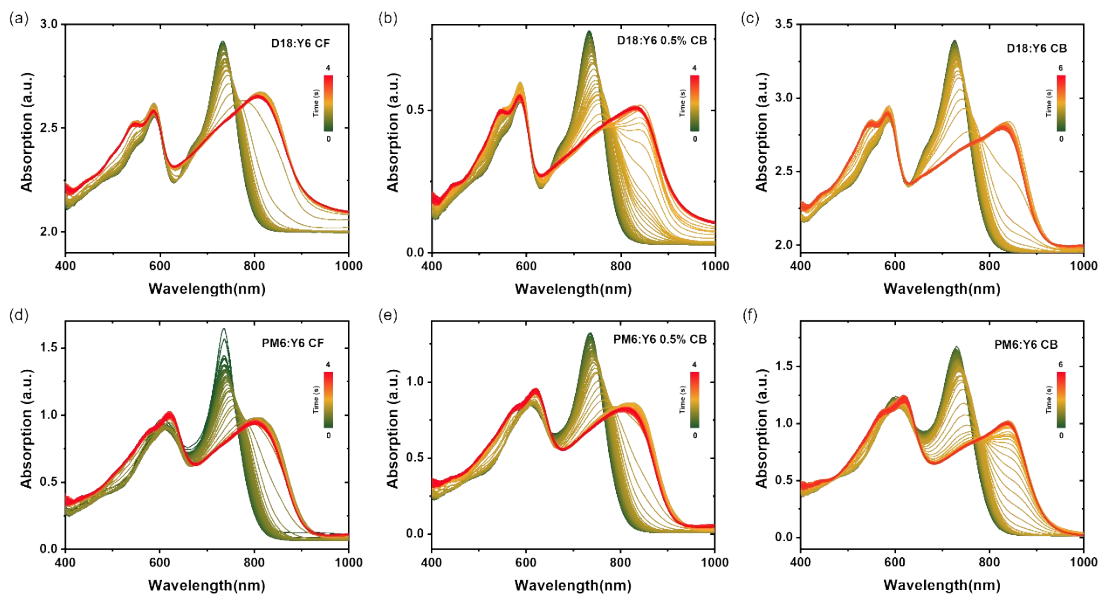

1  
2 **Figure S7.** In-situ UV-vis absorption spectra during slot-die coating of D18:Y6 (a-c) and  
3 PM6:Y6 (d-f).

4

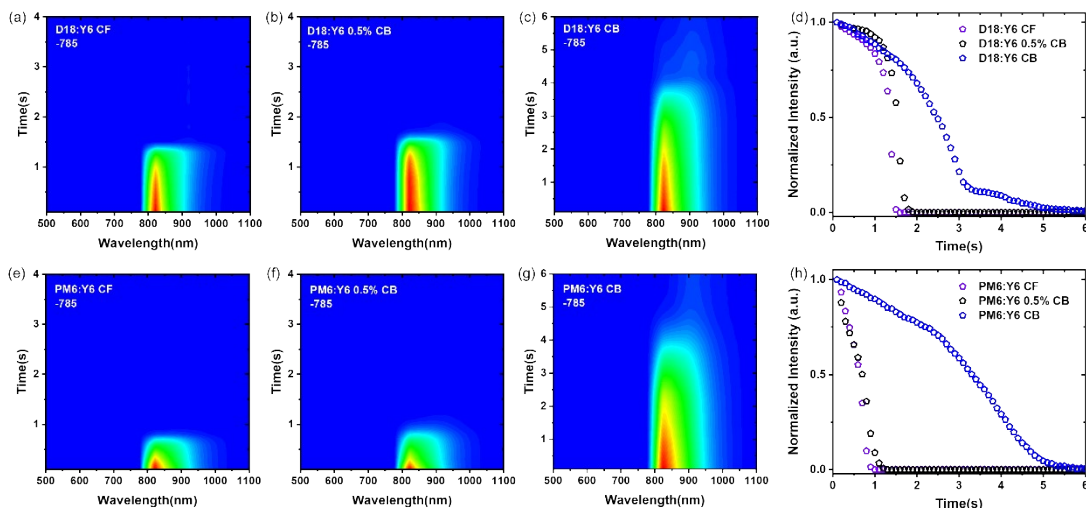

5  
6 **Figure S8.** Time-dependent contour maps of PL spectra during slot-die coating with  
7 D18:Y6 (a-c) and PM6:Y6 (d-f) blends. Time evolution of integral PL intensity during  
8 slot-die coating with D18:Y6 (d) and PM6:Y6 (h) blends. Y6 was excited in the PL spectra  
9 at 785nm.

1

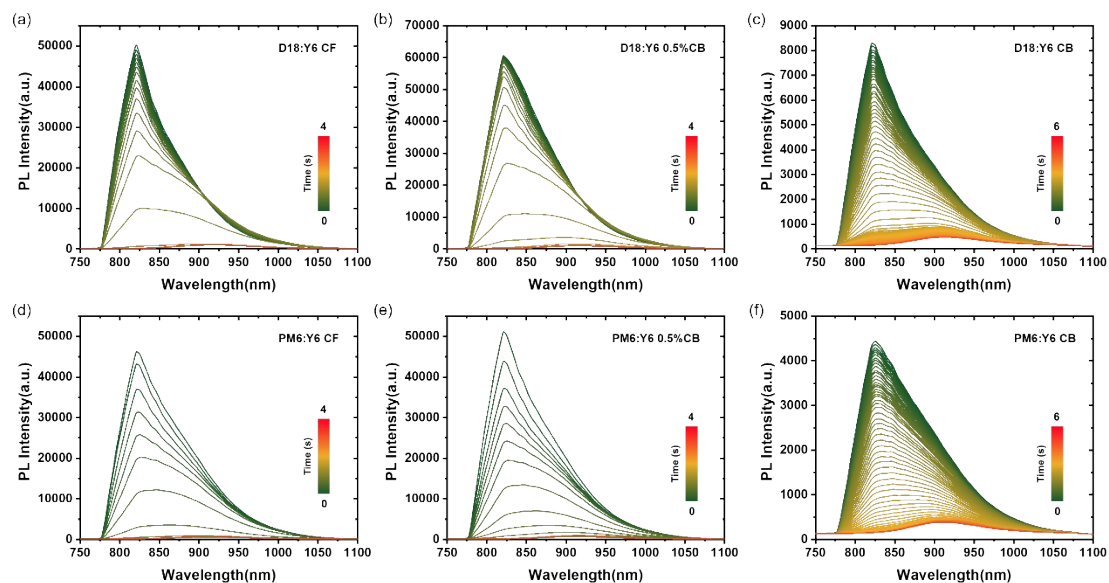

2

3 **Figure S9.** In-situ PL spectra during slot-die coating of D18:Y6 (a-c) and PM6:Y6 (d-f).

4

5

6

7

8

9

10

11

12

13

14

15

16

1

## 2 References

3

- 4 1. L. Zhan, S. Li, H. Zhang, F. Gao, T. K. Lau, X. Lu, D. Sun, P. Wang, M. Shi, C. Z. Li  
5 and H. Chen, *Adv. Sci.*, 2018, **5**, 1800755.
- 6 2. S. Chen, Y. Liu, L. Zhang, P. C. Y. Chow, Z. Wang, G. Zhang, W. Ma and H. Yan, *J.*  
7 *Am. Chem. Soc.*, 2017, **139**, 6298–6301.
- 8 3. J. A. Bartelt, D. Lam, T. M. Burke, S. M. Sweetnam and M. D. McGehee, *Adv. Energy*  
9 *Mater.*, 2015, **5**, 1500577.
- 10 4. A. Hexemer, W. Bras, J. Glossinger, E. Schaible, E. Gann, R. Kirian, A. MacDowell,  
11 M. Church, B. Rude and H. Padmore, *J. Phys. Conf. Ser.*, 2010, **247**, 012007.
- 12 5. W. Yang, W. Zaiyu, M. Xiangyi and M. Wei, *Prog. Chem.* **2017**, 29, 93.
- 13 6. E. Gann, A. T. Young, B. A. Collins, H. Yan, J. Nasiatka, H. A. Padmore, H. Ade, A.  
14 Hexemer, C. Wang, *Rev. Sci. Instrum.* **2012**, 83, 045110.
- 15 7. L. Ye, S. J. Stuard and H. Ade, *Conjugated Polymers*, CRC Press, **2019**, 427.
- 16 8. X. Jiao, L. Ye and H. Ade, *Adv. Energy Mater.*, 2017, **7**, 1700084.

17

18
